# Supplementary material for: A Ca2+-binding motif underlies the unusual properties of certain photosynthetic bacterial core light-harvesting complexes
Source: PubMed Central journal article supplement (PMC9133646; doi:10.1016/j.jbc.2022.101967), 2022-04-20
Supplement: mmc1.pdf [file mmc1.pdf]

## Supporting Information

### **A Ca<sup>2+</sup>-binding motif underlies the unusual properties of certain photosynthetic bacterial core light-harvesting complexes**

K. Tani<sup>1,†,\*</sup>, K. Kobayashi<sup>2,†</sup>, N. Hosogi<sup>2</sup>, X.-C. Ji<sup>3</sup>, S. Nagashima<sup>4</sup>, K. V. P. Nagashima<sup>4</sup>, A. Izumida<sup>5</sup>, K. Inoue<sup>4,5</sup>, Y. Tsukatani<sup>6</sup>, R. Kanno<sup>7</sup>, M. Hall<sup>7</sup>, L.-J. Yu<sup>8</sup>, I. Ishikawa<sup>2</sup>, Y. Okura<sup>2</sup>, M. T. Madigan<sup>9</sup>, A. Mizoguchi<sup>1</sup>, B. M. Humbel<sup>7</sup>, Y. Kimura<sup>10,\*</sup> & Z.-Y. Wang-Otomo<sup>3,\*</sup>

Corresponding authors: K. Tani, Y. Kimura and Z.-Y. Wang-Otomo

E-mail: ktani@doc.medic.mie-u.ac.jp; ykimura@people.kobe-u.ac.jp;  
wang@ml.ibaraki.ac.jp

#### **This file contains:**

- (1) Tables S1 to S2
- (2) Figures S1 to S11

**Table S1. Cryo-EM data collection, refinement and validation statistics of the *Alc. tepidum* LH1-RC complex**

---

|                                                     | LH1-RC complex<br>(EMDB-32100)<br>(PDB-7VRJ) |
|-----------------------------------------------------|----------------------------------------------|
| <b>Data collection and processing</b>               |                                              |
| Magnification                                       | 60000                                        |
| Voltage (kV)                                        | 300                                          |
| Electron exposure (e <sup>-</sup> /Å <sup>2</sup> ) | 40                                           |
| Defocus range (μm)                                  | -1.0 to -3.0                                 |
| Calibrated pixel size (Å)                           | 0.814                                        |
| Detector physical pixel size (μm)                   | 5                                            |
| Symmetry imposed                                    | C1                                           |
| Initial particle images (no.)                       | 309706                                       |
| Final particle images (no.)                         | 156992                                       |
| Map resolution (Å)                                  | 2.8                                          |
| FSC threshold                                       | 0.143                                        |
| Map resolution range (Å)                            | 326–2.8                                      |
| <b>Refinement</b>                                   |                                              |
| Initial model used (PDB code)                       | 5Y5S                                         |
| Model resolution (Å)                                | 2.9                                          |
| FSC threshold                                       | 0.5                                          |
| Model resolution range (Å)                          | 140–2.8                                      |
| Map sharpening <i>B</i> factor (Å <sup>2</sup> )    | -62                                          |
| Model composition                                   |                                              |
| Non-hydrogen atoms                                  | 26309                                        |
| Protein residues                                    | 604                                          |
| Ligands                                             | 114                                          |
| <i>B</i> factors (Å <sup>2</sup> )                  |                                              |
| Protein                                             | 39.9                                         |
| Ligand                                              | 38.2                                         |
| R.m.s. deviations                                   |                                              |
| Bond lengths (Å)                                    | 0.006                                        |
| Bond angles (°)                                     | 2.767                                        |
| Validation                                          |                                              |
| MolProbity score                                    | 1.77                                         |
| Clashscore                                          | 9.32                                         |
| Poor rotamers (%)                                   | 1.43                                         |
| Ramachandran plot                                   |                                              |
| Favored (%)                                         | 97.10                                        |
| Allowed (%)                                         | 2.86                                         |
| Disallowed (%)                                      | 0.04                                         |

---

**Table S2. Comparison of the distances of His–BChl(Mg) and BChl(Mg)–BChl(Mg) in LH1, LH2 and RC special pairs from various phototrophic bacteria.**

| LH1 or LH2                        | Distance of His(Nε2)<br>to BChl–Mg (Å) <sup>a</sup> |             | Distance of<br>Mg–Mg (Å) <sup>a</sup> |             |
|-----------------------------------|-----------------------------------------------------|-------------|---------------------------------------|-------------|
|                                   | α                                                   | β           | Long                                  | Short       |
| <i>Alc. tepidum</i> (LH1)         | <b>2.54</b>                                         | <b>2.29</b> | <b>9.52</b>                           | <b>8.75</b> |
| <i>Rba. sphaeroides</i> (LH1)     | 2.58                                                | 2.20        | 9.55                                  | 8.37        |
| <i>Rsp. rubrum</i> (LH1)          | 2.27                                                | 2.03        | 9.34                                  | 8.51        |
| <i>Rps. palustris</i> (LH1-W)     | 2.93                                                | 2.71        | 9.61                                  | 8.29        |
| <i>Tch. tepidum</i> (LH1)         | 2.19                                                | 2.19        | 8.88                                  | 8.72        |
| <i>Trv.</i> strain 970 (LH1)      | 2.61                                                | 2.32        | 8.90                                  | 8.46        |
| <i>Blc. viridis</i> (LH1)         | 2.54                                                | 2.25        | 8.8                                   | 8.5         |
| <i>Rfx. castenholzii</i> (B880)   | 2.32                                                | 2.29        | 9.5                                   | 9.3         |
| <i>Rbl. acidophilus</i> (B850)    | 2.34                                                | 2.34        | 9.5                                   | 8.8         |
| <i>Phs. molischianum</i> (B850)   | 2.27                                                | 2.32        | 9.2                                   | 8.9         |
| RC (special pair)                 | L-subunit                                           | M-subunit   | BChl <i>a</i> (L)–BChl <i>a</i> (M)   |             |
| <i>Alc. tepidum</i>               | <b>2.44</b>                                         | <b>2.49</b> | <b>7.97</b>                           |             |
| <i>Rba. sphaeroides</i> (LH1-RC)  | 2.21                                                | 2.11        | 7.79                                  |             |
| <i>Rba. sphaeroides</i> (RC-only) | 2.27                                                | 2.06        | 7.84                                  |             |
| <i>Rsp. rubrum</i>                | 2.09                                                | 2.12        | 7.76                                  |             |
| <i>Rps. palustris</i>             | 2.73                                                | 2.74        | 7.69                                  |             |
| <i>Tch. tepidum</i>               | 2.17                                                | 2.19        | 7.87                                  |             |
| <i>Trv.</i> strain 970            | 2.33                                                | 2.31        | 7.65                                  |             |
| <i>Blc. viridis</i>               | 2.36                                                | 2.35        | 7.83                                  |             |

<sup>a</sup> These values were derived from Protein Data Bank: 7EQD for *Rsp. rubrum*, 5Y5S for *Tch. tepidum*, 7C9R for *Trv.* strain 970, 6Z5S for *Rps. palustris*, 6ET5 for *Blc. viridis*, 5YQ7 for *Rfx. castenholzii*, 1NKZ for *Rbl. acidophilus* (previously *Rps. acidophila*), 1LGH for *Phs. molischianum*, 2J8C for *Rba. sphaeroides* (RC-only).

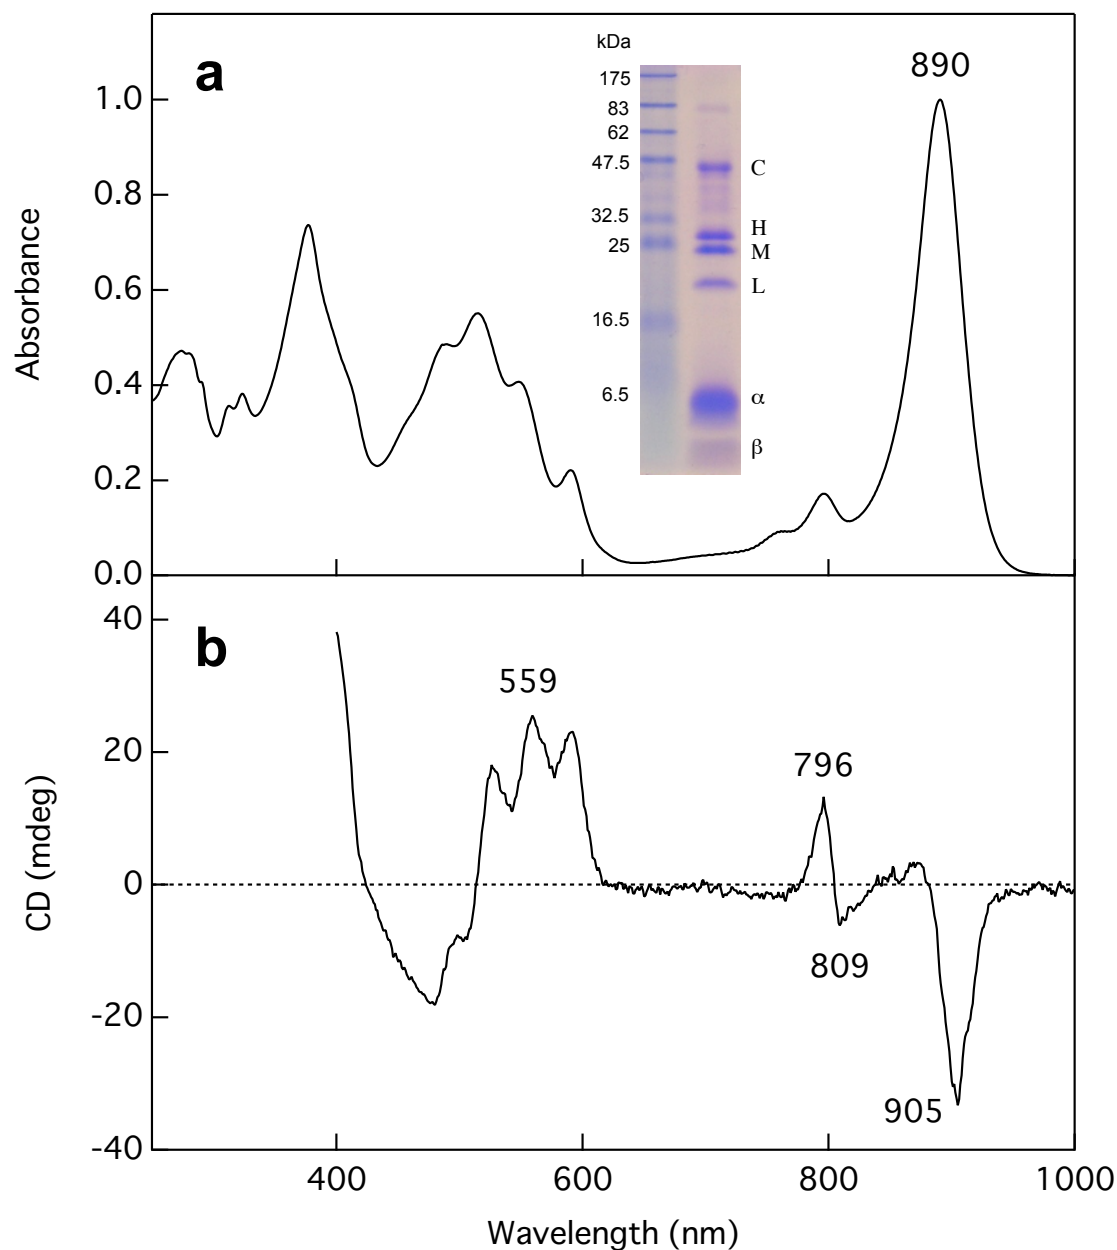

**Figure S1. Absorption (a) and circular dichroism (b) spectra of the purified *Alc. tepidum* LH1-RC complex at room temperature.** Inset: Coomassie blue-stained 12% SDS-PAGE gel for the purified LH1-RC with their assignments indicated. CD spectrum was recorded on a Jasco J-720w spectropolarimeter in the range from 400 nm to 1000 nm under the following conditions: 100 nm/min scan speed, 5 nm bandwidth, 1 sec response time, 5 scans.

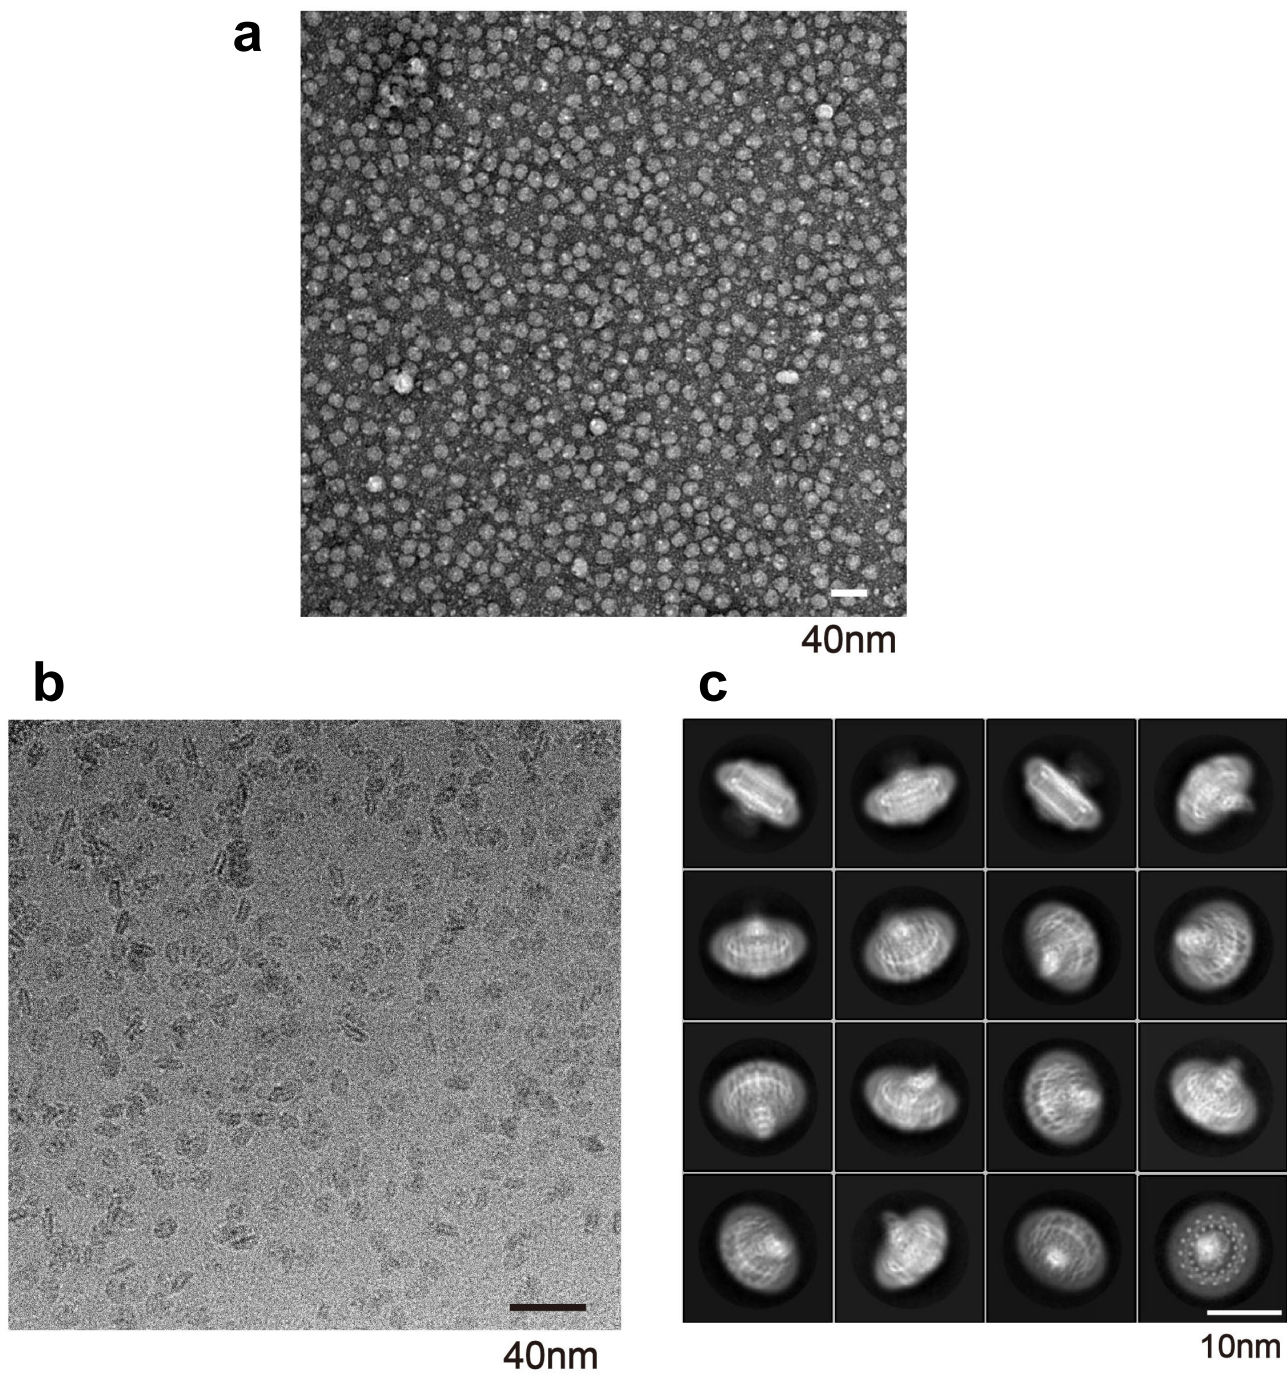

**Figure S2. Electron micrographs of the *Alc. tepidum* LH1-RC complex.** A representative negatively stained (a) and cryo-EM (b) micrographs of the purified LH1-RC particles. (c) Representative 2D class averages from cryo-EM micrographs.

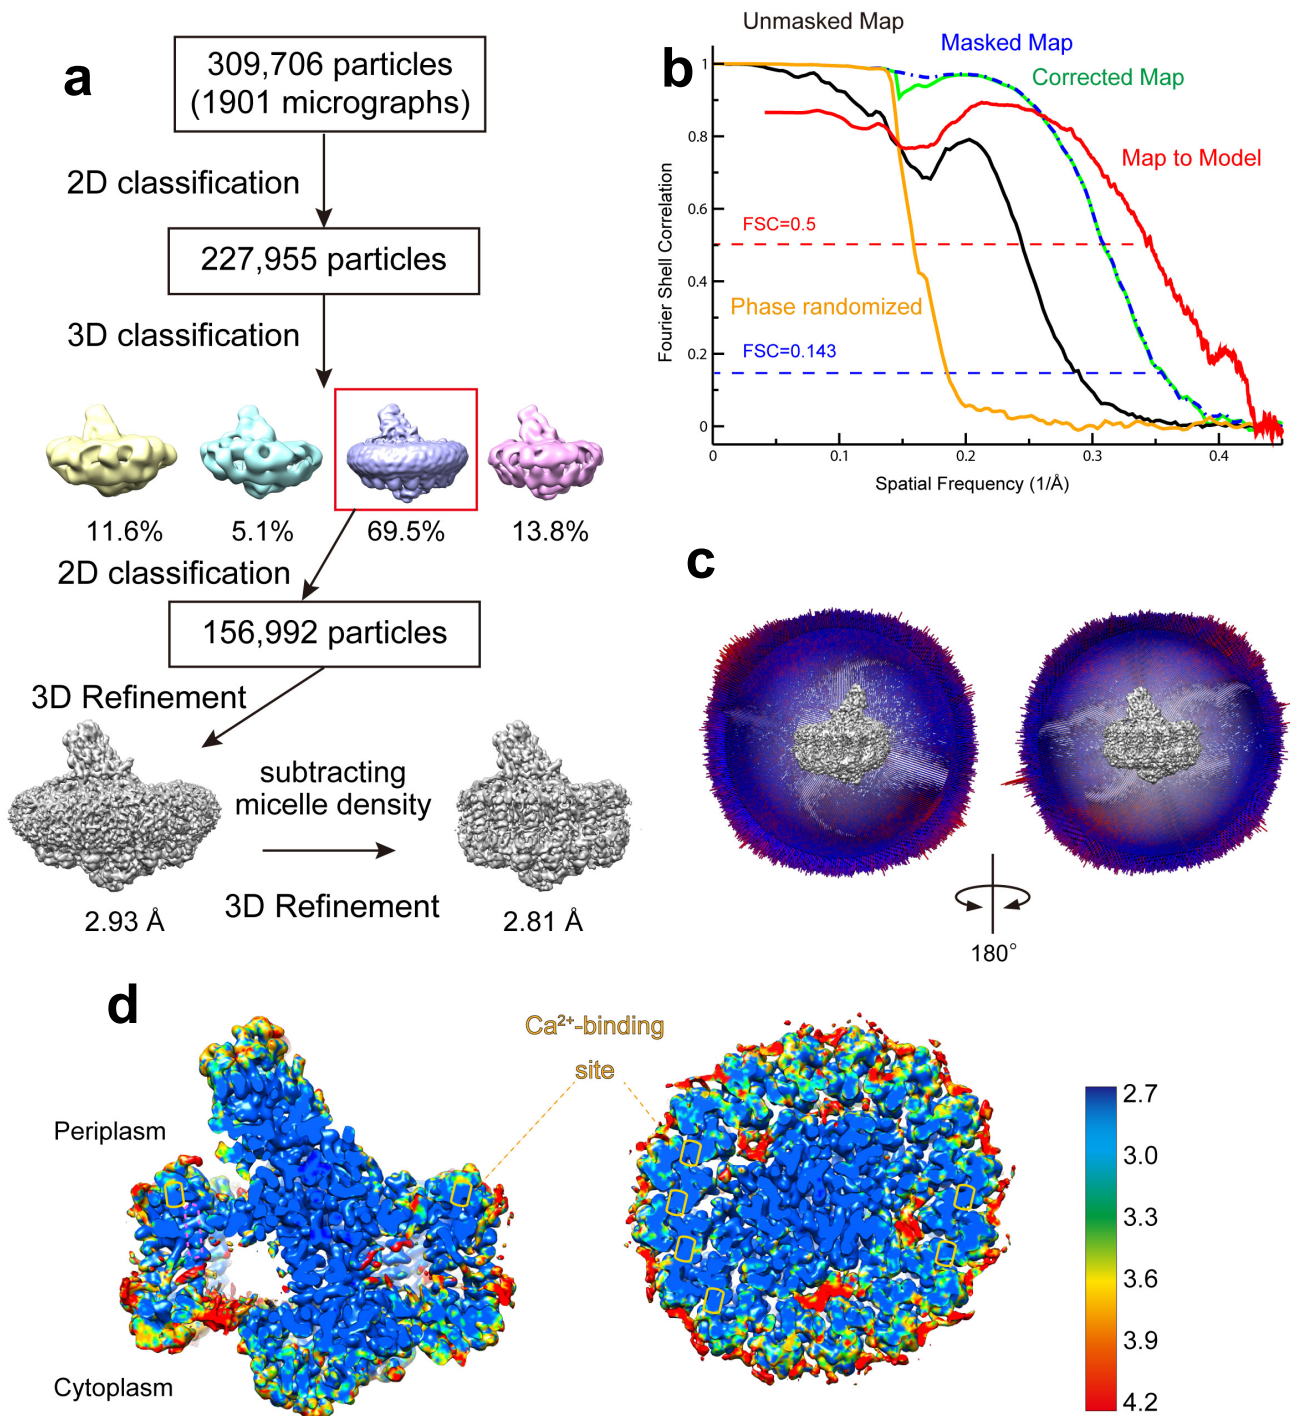

**Figure S3. Structure determination of the *Alc. tepidum* LH1-RC complex by cryo-EM.**

(a) Image processing flow of 3D classification and reconstruction. (b) The Fourier shell correlation (FSC) plots of the cryo-EM map (unmasked: black, masked: blue, phase randomized corrected: green, phase randomized: orange) and the FSC plot of the model versus the final map (red) are superimposed. (c) Angular distribution of reconstructed particles. (d) Local resolution representation of the LH1-RC structure. A longitudinal sectional view (*left*) and a central cross sectional view (*right*) from periplasmic side. The map is shown in rainbow colors as shown in the right color bar. The contour level of the map raw density is 0.005.

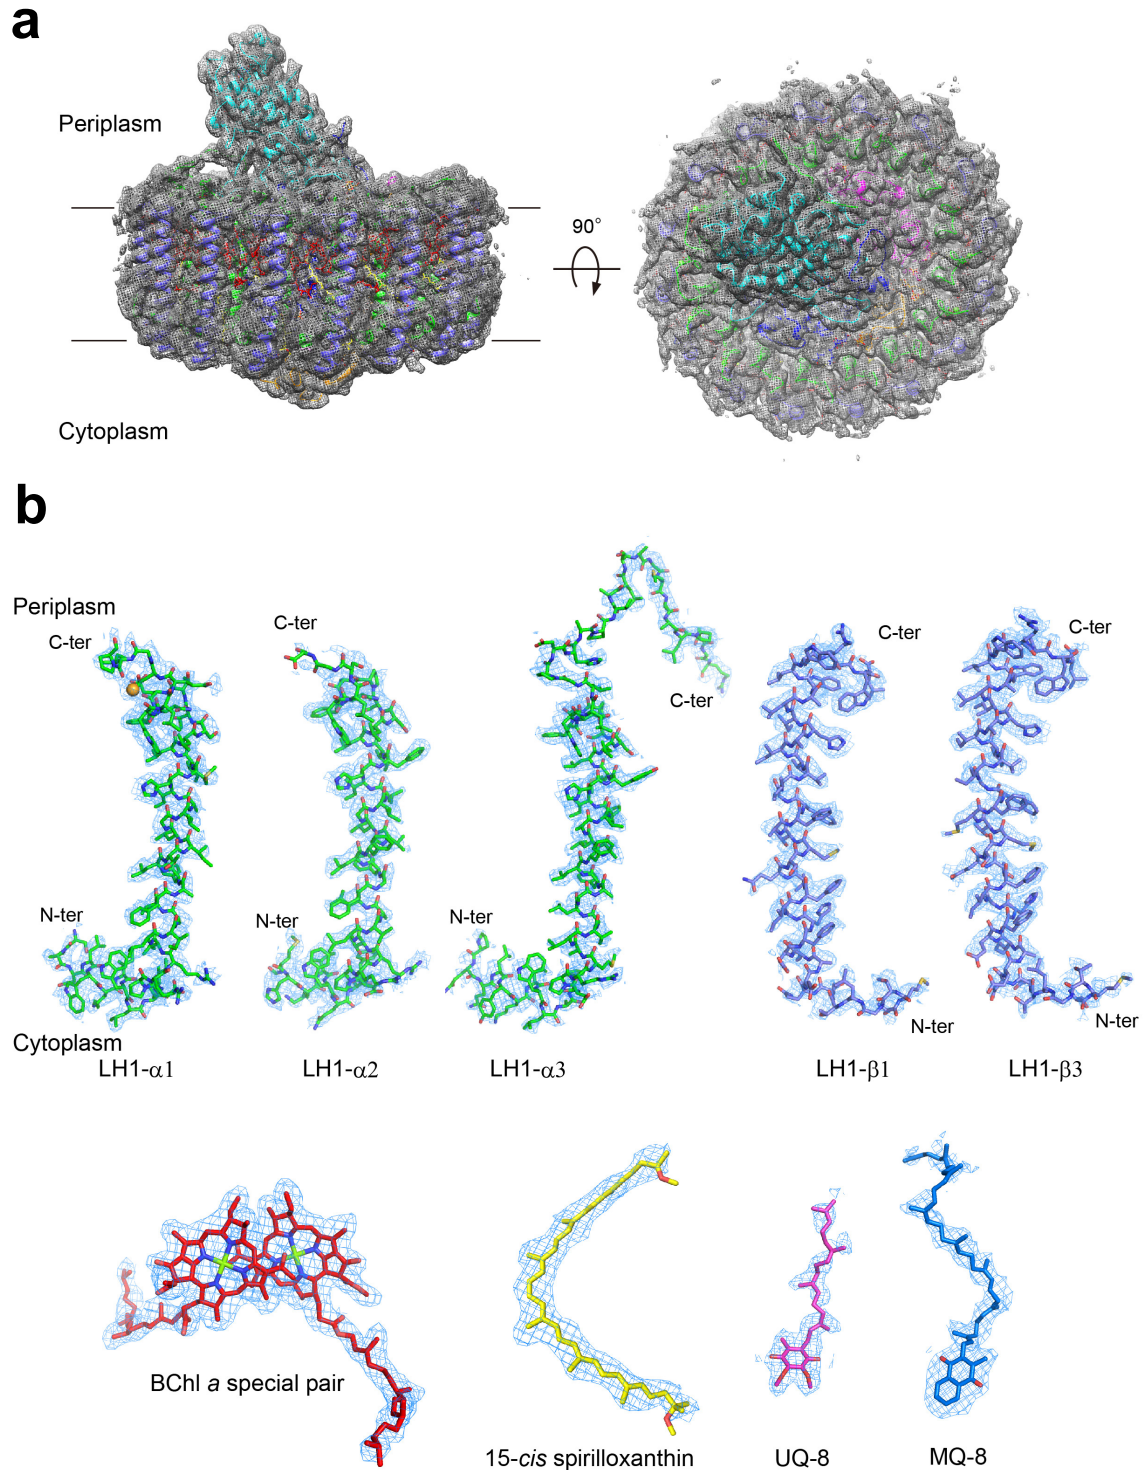

**Figure S4. Cryo-EM densities and structural models in the *Alc. tepidum* LH1-RC complex.** (a) Overall structure of the LH1-RC complex. Cartoon representation of the complex with the cryo-EM density in gray mesh. Side view (*left*) parallel to the membrane plane and top view (*right*) from periplasmic side. (b) Selected polypeptides and cofactors. The density maps are shown at a contour level of  $4.0\sigma$ , except for the UQ-8 and MQ-8 ( $3.0\sigma$ ). The color codes are the same as in Fig. 1.

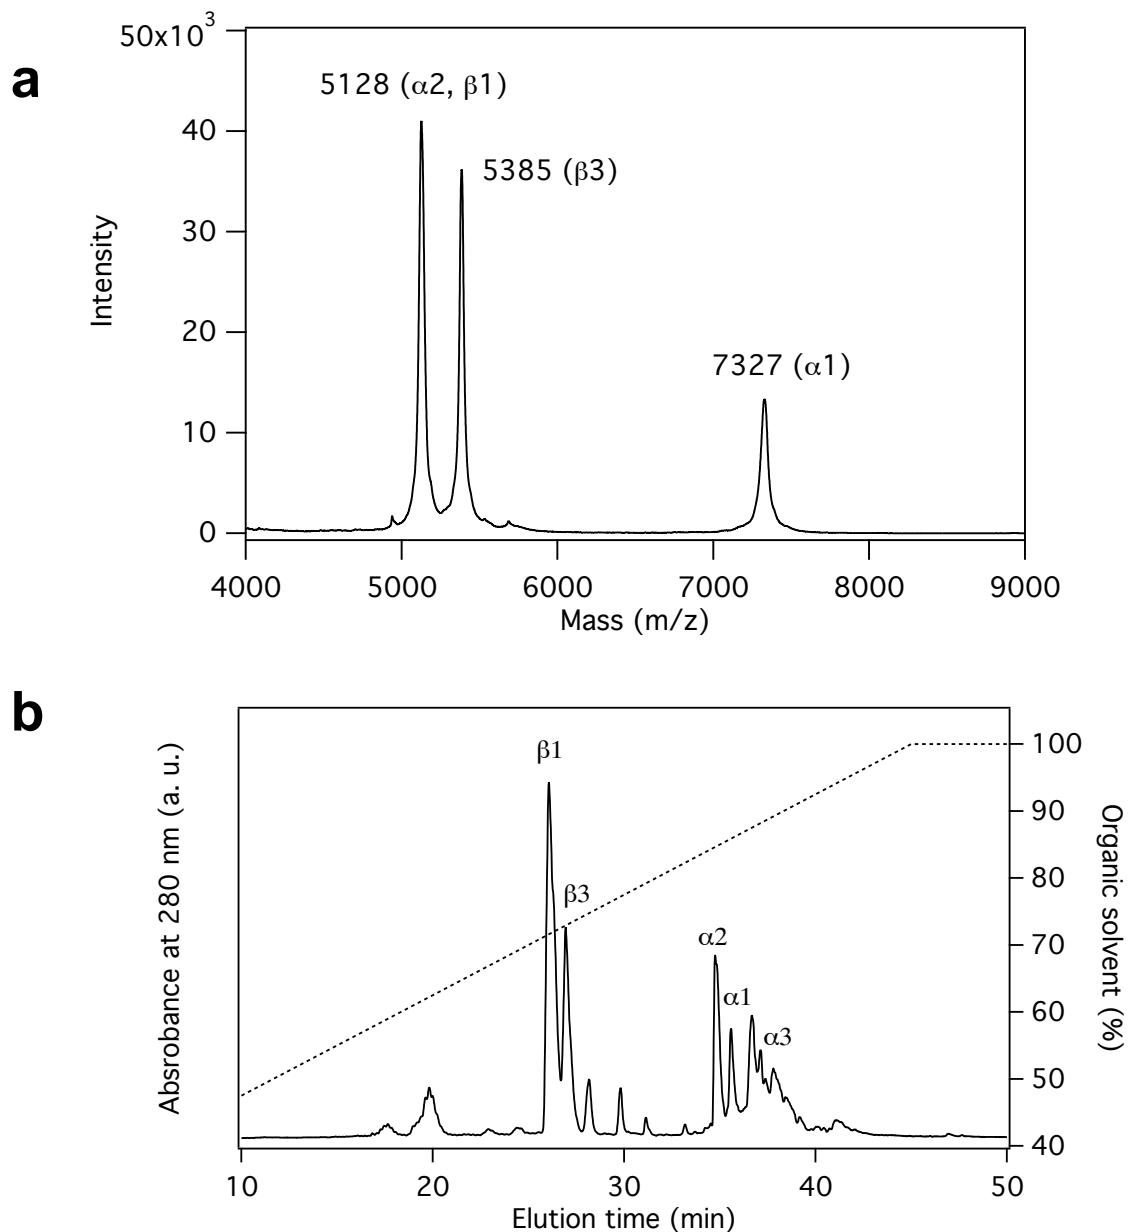

**c**

α1 formyl-MSPDLWKIWLIDPRRVLI AVFAFLTILGLAIHMILLSTTEFNWLEDGIPAAKVQQVTPVVPQR ( $M_w=7325$ )

α2 formyl-MHKIWQIFDPRRTLVALFGFLFVLGLLIHFILLSSPAFNWLSGS ( $M_w=5131$ )

α3 MPQQLYKIWLAFDPRMALIGLGAFLFALALFIHYMLLSSPGFDWLLGPDHAPVALSAGMSALPAGR ( $M_w=7188$ )

β1 ANSSMTGLTEQEAQEFHGIFVQSMTAFFGIVVIAHILAWLWRPWL ( $M_w=5135$ )

β2 MANENRSMGLTEDEAREFHGIFVSSFVVFTGIVVVAHILVWLWRPWL

β3 ADQKSMTGLTEDEAKEFHGIFTQSMTMFFGIVIIAHILAWLWRPWL ( $M_w=5368$ )

**Figure S5. Characterization of the *Alc. tepidum* LH1 polypeptides.** (a) MALDI-TOF/MS spectrum of the purified LH1-RC obtained under the same conditions as described in the Materials and Methods section. α2- and β1-polypeptides were not resolved. (b) Reverse-phase HPLC chromatograms (TSKgel, SuperODS, 4.6×100 mm, TOSO) of the purified LH1-RC eluted at 25°C by a gradient of 40–100% organic solvent consisted of acetonitrile/2-propanol (2:1) containing 0.1% trifluoroacetic acid. (c) Amino acid sequences of the expressed LH1 αβ-polypeptides with calculated molecular weight ( $M_w$ ). The β2-polypeptide (gray fonts) was not detected.



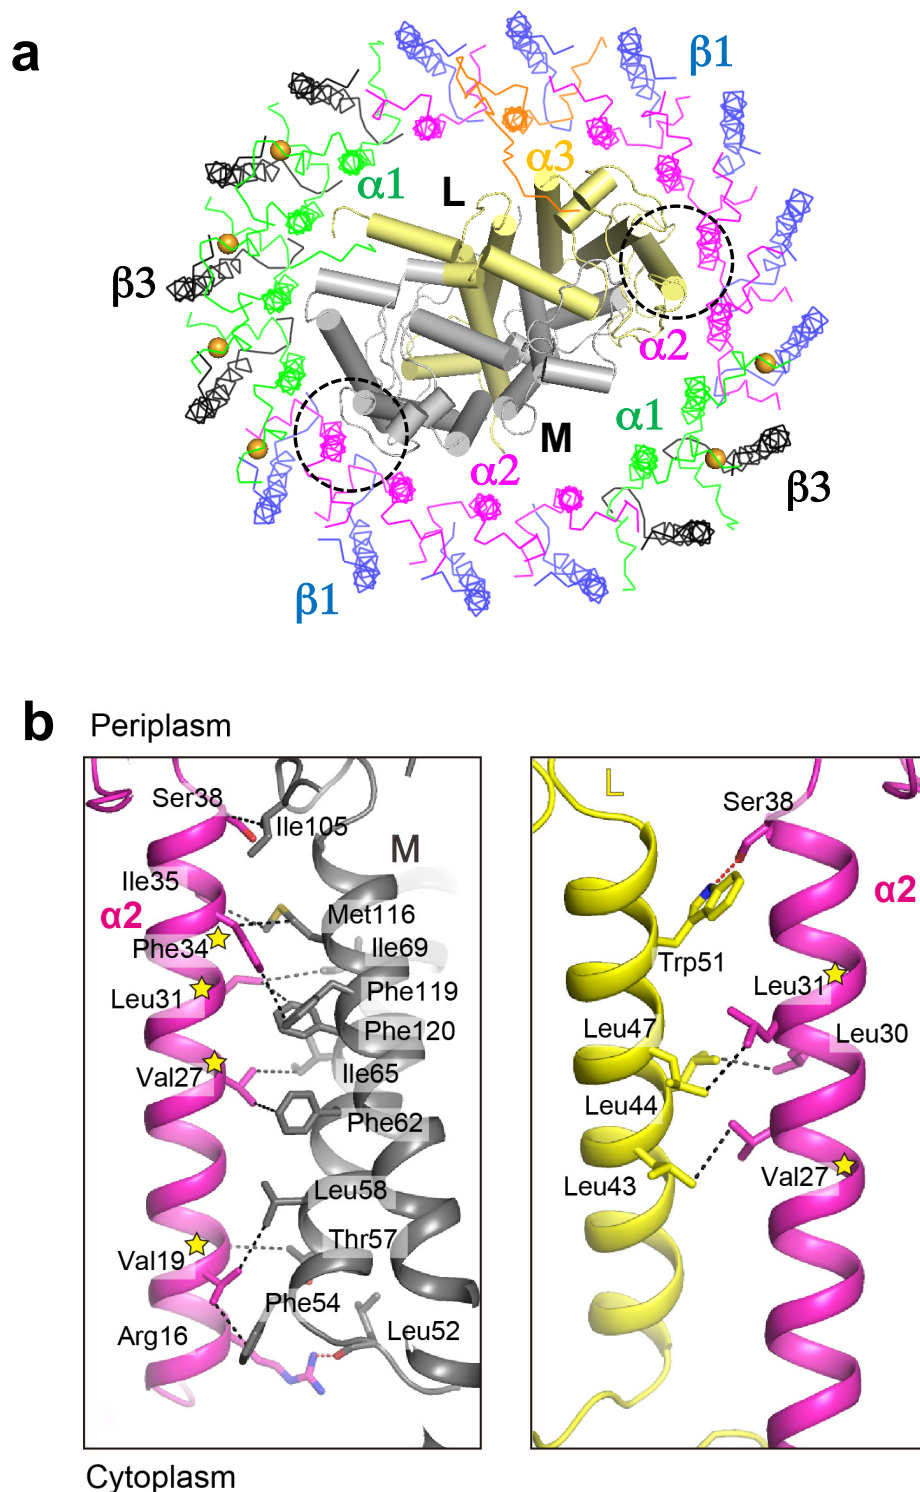

**Figure S6. Interactions between LH1/RC of *Alc. tepidum*.** (a) Interacting sites (dashed circles) between LH1  $\alpha 2$ -polypeptides (magenta) and the RC L(light-yellow)- and M(gray)-subunits. Color scheme is same as in Fig. 2a. (b) Interactions in the transmembrane region between LH1  $\alpha 2$ (magenta)- and M(gray) or L(yellow)-polypeptides. Dashed lines indicate distances in a range of 2.6–4.5 Å. The star symbol indicates an unique residue of  $\alpha 2$  among  $\alpha$ -polypeptides. Residue numbers for  $\alpha 2$  are indicated as offset of +4 from the N-terminus Met.

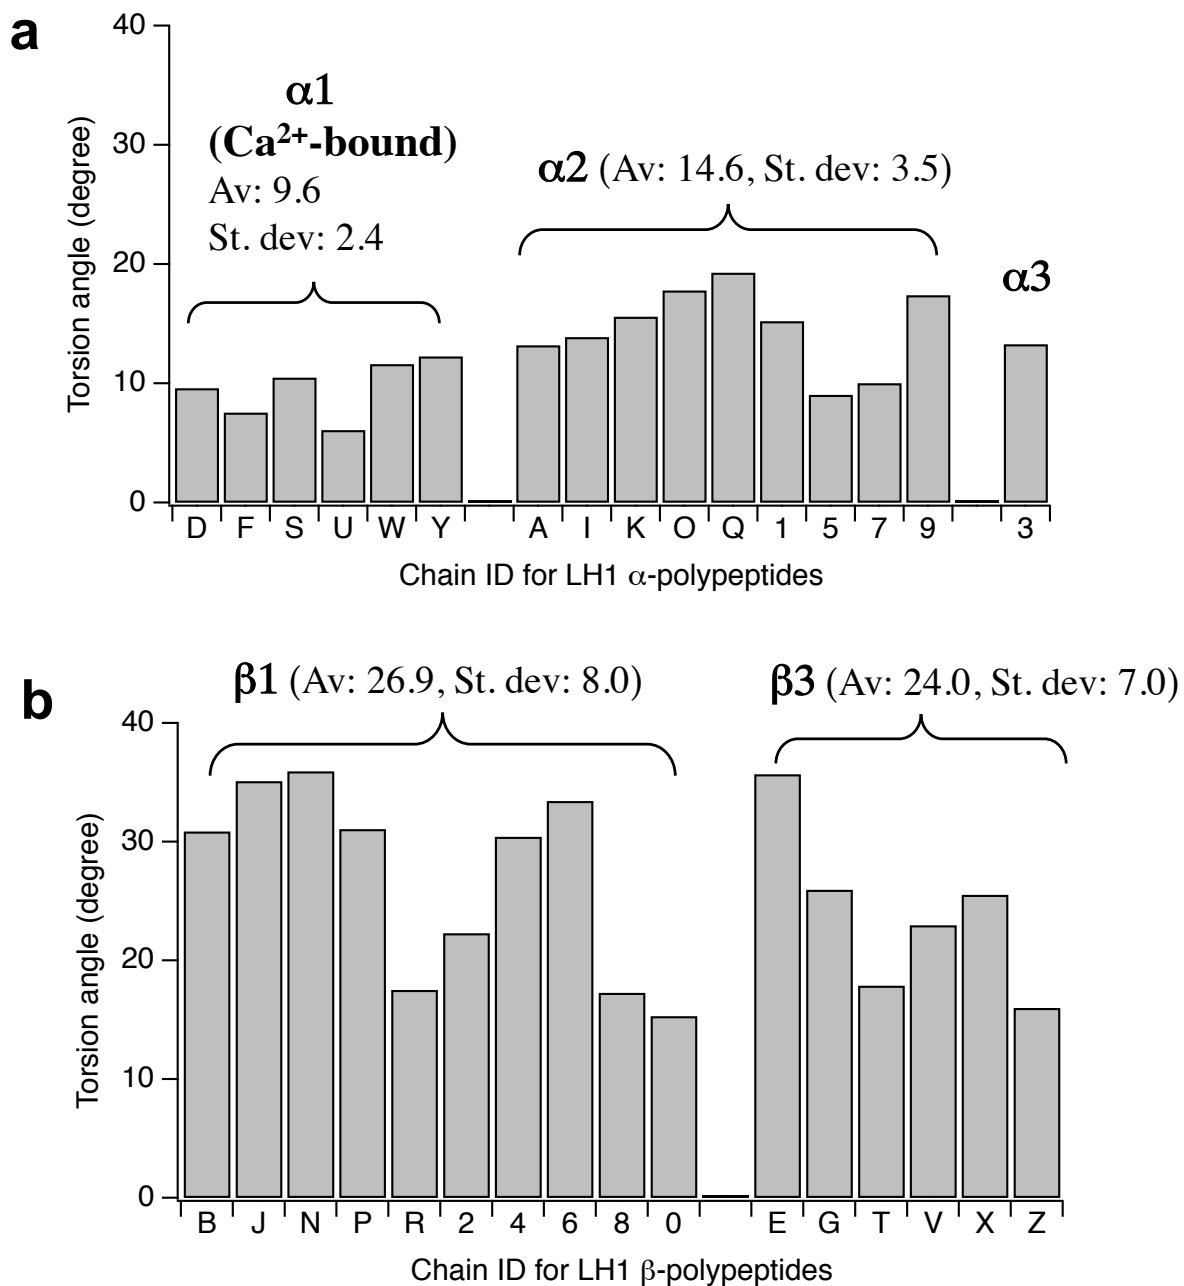

**Figure S7. Torsion angle distribution of the BChl *a* C3-acetyl group in *Alc. tepidum* LH1. (a) LH1  $\alpha$ -polypeptides. (b) LH1  $\beta$ -polypeptides.**

**a***pufA**A. tepidum* A1 MSPDLWKIWLLIDPRRVLIAVFAFLTILGLAIHMILLSTTEFNWLEDGIPAAKVQQVTPVVPQR*A. vinosum* A1 MSPDLWKIWLLVDPRRILIAVFAFLTIVLGLAIHMILLSTAEFNWLEDGVPAAVTVQQVTPVVPQR*A. tepidum* A2 MHKIWQIFDPRRTLVALFGFLFVLGLLIHFILLSSPAFNWLSGS*A. vinosum* A2 MHKIWQIFDPRRTLVALFGFLFVLGLLIHFILLSSPAFNWLSGS*A. tepidum* A3 MPQQLYKIWLAFDPRMALIGLGAFALFALALFIHYMLLSSPGFDWLLGPDHAPVALSAGMSALPAGR*A. vinosum* A3 MMPQQLYKIWLAFDPRMALIGLGAFALFALALFIHYMLLRSPDFDWLLGPDYAPVTVLSAGMSALPAGR*pufB**A. tepidum* B1 MANSSMTGLTEQEAQEFHGIFVQSMTAFFGIVVIAHILAWLWRPWL*A. vinosum* B1 MANSSMTGLTEQEAQEFHGIFVQSMTAFFGIVVIAHILAWLWRPWL*A. tepidum* B2 MANENRSMGLTEDEAREFHGIFVSSFVVFTGIVVVAHILVWLWRPWL*A. vinosum* B2 MANENRSMGLTEDEAREFHGIFVSSFVVFTGIVVVAHILVWLWRPWL*A. tepidum* B3 MADQKSMTGLTEDEAKEFHGIFTQSMTMFFGIVVIAHILAWLWRPWL*A. vinosum* B3 MADQKSMTGLTEEEAKEFHGIFTQSMTMFFGIVVIAHILAWLWRPWL**b*****Alc. tepidum*  $\alpha$ - and  $\beta$ -polypeptides**

|            |            |            |
|------------|------------|------------|
|            | $\alpha 2$ | $\alpha 3$ |
| $\alpha 1$ | <b>57</b>  | 39         |
| $\alpha 2$ |            | <b>57</b>  |

|           |           |           |
|-----------|-----------|-----------|
|           | $\beta 2$ | $\beta 3$ |
| $\beta 1$ | 72        | <b>80</b> |
| $\beta 2$ |           | 66        |

**Figure S8. Sequence comparison of the LH1 polypeptides between *Alc. tepidum* and *Alc. vinosum*, and of *Alc. tepidum*.** (a) Alignments of amino acid sequences encoded in the *Alc. tepidum* and *Alc. vinosum* genomes for each PufA and PufB pairs. Differences of the residues between the two species are indicated by red fonts. (b) Comparison of the sequence similarities between the  $\alpha$ - and  $\beta$ -polypeptides of *Alc. tepidum* using sequence alignment scores from the CLUSTAL 2.1.

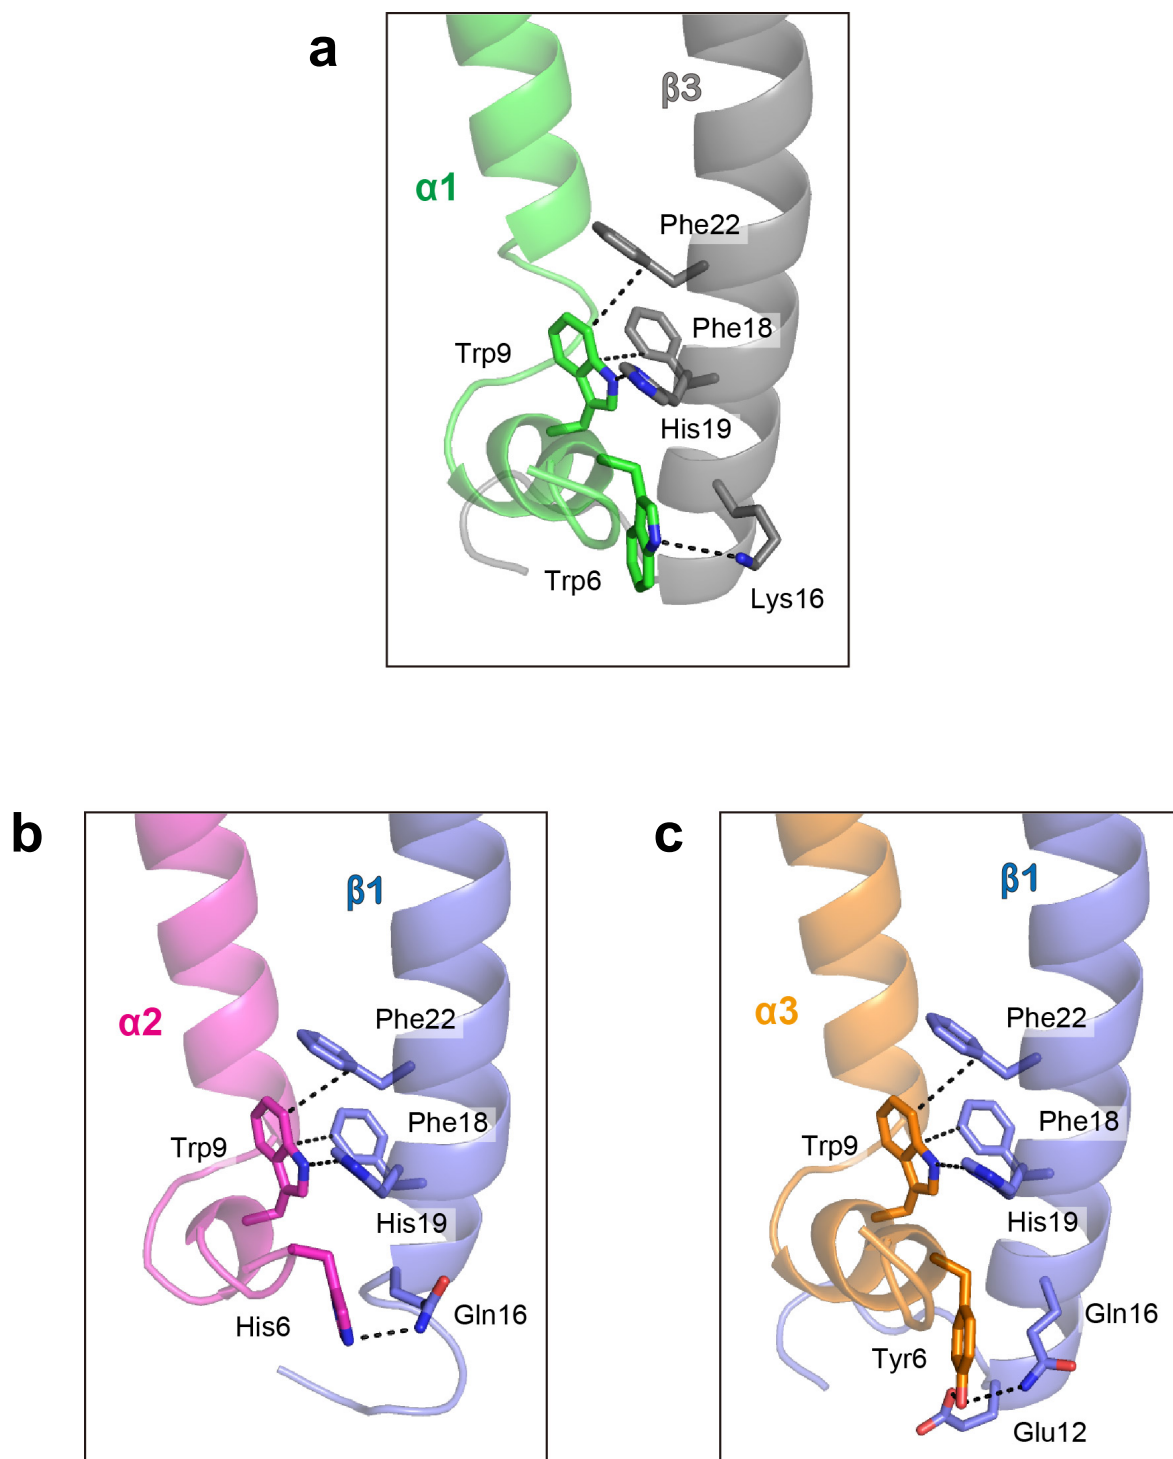

**Figure S9. Interactions between LH1  $\alpha/\beta$ -polypeptides of *Alc. tepidum*.**

Interactions in the N-terminal domains between LH1  $\alpha$ 1(green)- and  $\beta$ 3(gray)-polypeptides (**a**), between LH1  $\alpha$ 2(magenta)- and  $\beta$ 1(slate blue)-polypeptides (**b**), and between LH1  $\alpha$ 3(orange)- and  $\beta$ 1(slate blue)-polypeptides (**c**). Dashed lines indicate distances in a range of 2.6–4.2 Å. Residue numbers for  $\alpha$ 2 and  $\beta$ 1 are indicated as offsets of +4 and +1, respectively, from the N-terminus Met.

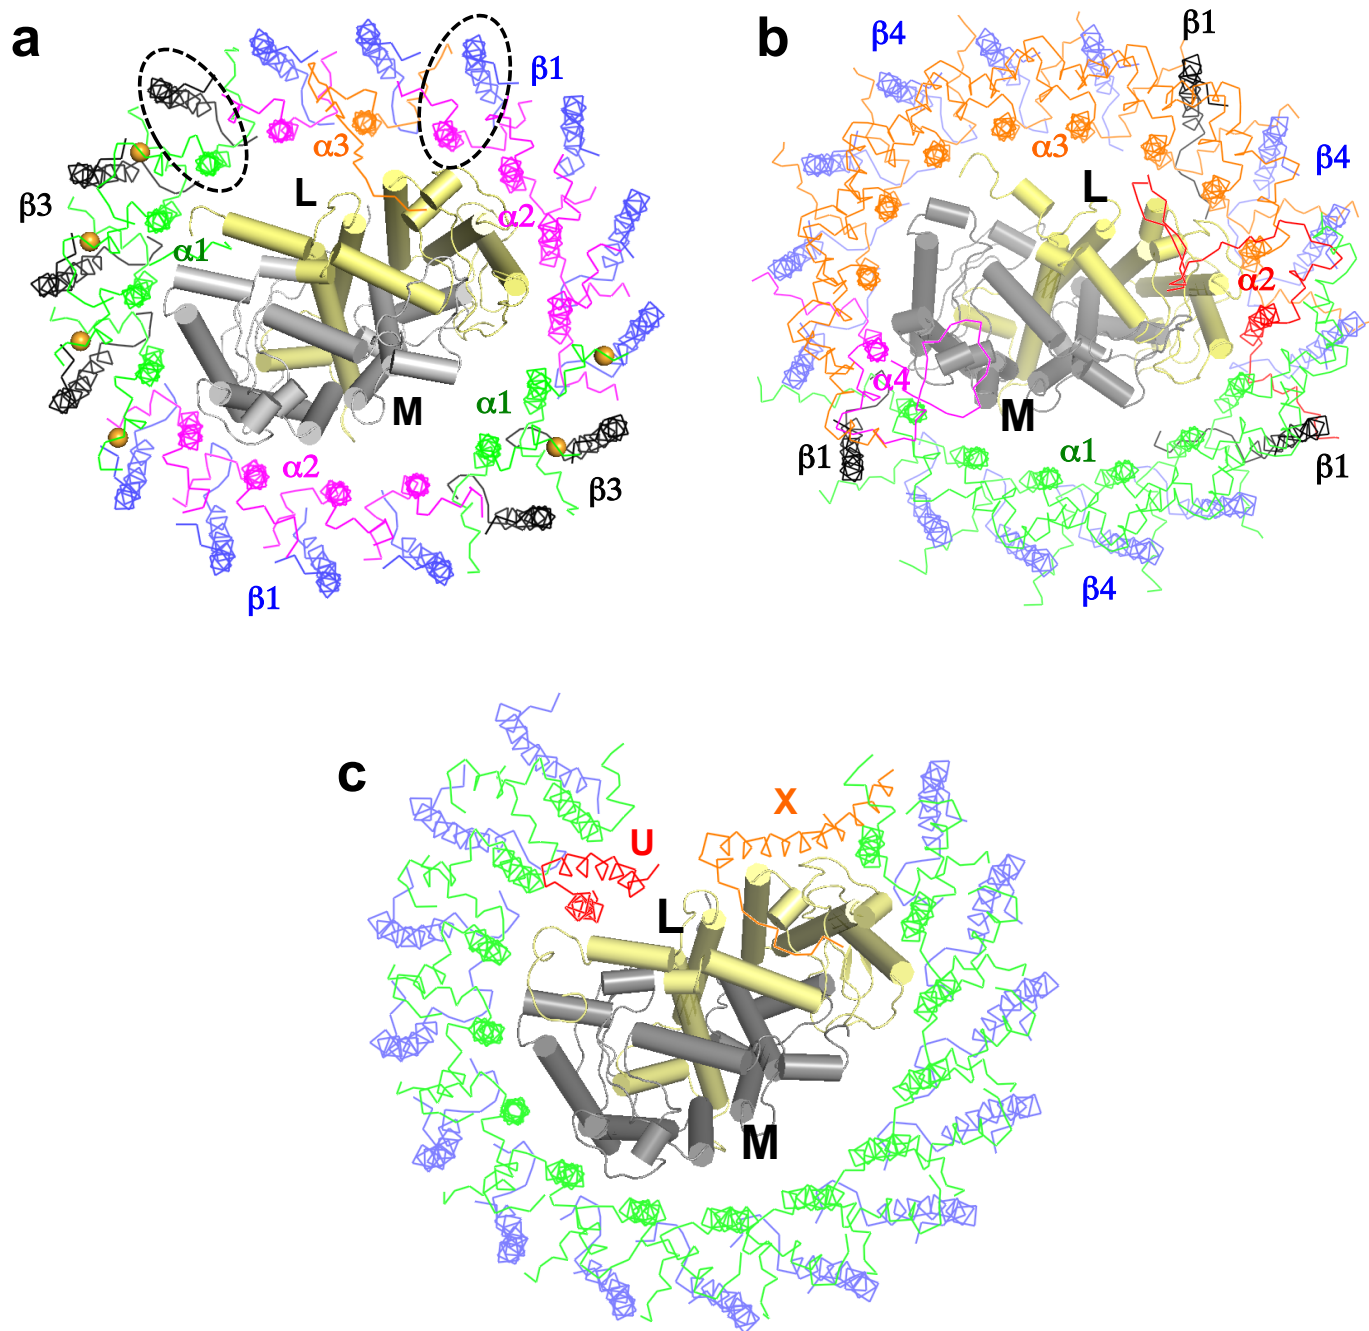

**Figure S10.** Comparison of arrangement of the *Alc. tepidum* LH1  $\alpha\beta$ -polypeptides (a) with those of *Trv. strain 970* (b) and *Rba. sphaeroides* strain IL106 (c). (a) Arrangement of the multiple *Alc. tepidum* LH1  $\alpha\beta$ -polypeptides around the RC. Dashed ellipses indicate face-to-face dimeric subunits. (b) Arrangement of the multiple *Trv. strain 970* LH1  $\alpha\beta$ -polypeptides around the RC. (c) Arrangement of the LH1  $\alpha\beta$ -polypeptides from *Rba. sphaeroides* strain IL106 around the RC, PufX (orange) and protein-U (red).

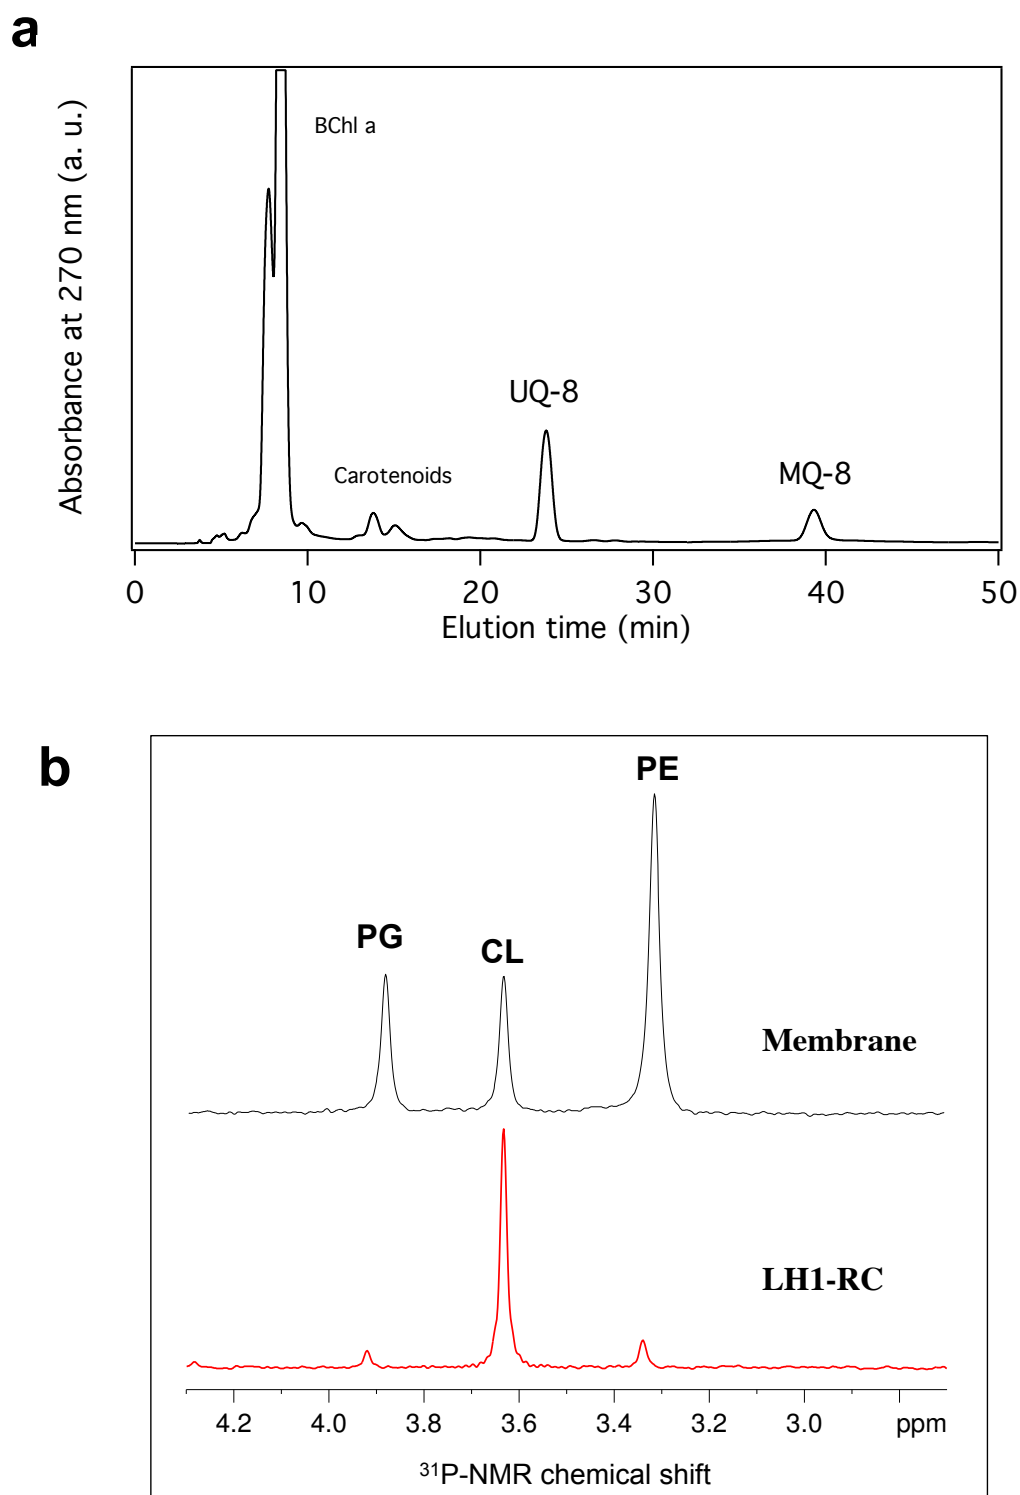

**Figure S11. Identifications of the quinone molecules and phospholipid in *Alc. tepidum*.** (a) Reverse-phase HPLC chromatograms (TSKgel, SuperODS, 4.6×100 mm, TOSOH) of the quinones and pigments extracted from the purified LH1-RC complex (25 °C, 7:3 methanol/isopropanol, flow rate 0.7 mL/min). (b) <sup>31</sup>P-NMR spectra of phospholipids extracted from the membrane and purified LH1-RC under the same conditions as described in the Materials and Methods section.
